# Supplementary material
Source: PubMed Central journal article supplement (PMC7415657)
Supplement: NIHMS1597945-supplement-5.pdf [file NIHMS1597945-supplement-5.pdf]

**Table S1. Selected functional pathways enriched with EMP2 mRNA upregulation based on TCGA database ([www.cbioportal.org](http://www.cbioportal.org); N=1105 samples).** The top 50 pathways involved with breast cancer and having a nominal p value<0.05 are included, and pathways highlighting metastasis, therapeutic resistance, and hypoxia are bolded.

| NAME                                                             | SIZE | NOM p-val  | FDR q-val   |
|------------------------------------------------------------------|------|------------|-------------|
| FINETTI_BREAST_CANCERS_KINOME_BLUE                               | 21   | 0          | 7.29E-05    |
| LIM_MAMMARY_STEM_CELL_DN                                         | 405  | 0          | 7.06E-05    |
| <b>ANASTASSIOU_MULTICANCER_INVASIVENESS_SIGNATURE</b>            | 63   | 0          | 3.86E-04    |
| <b>CREIGHTON_ENDOCRINE_THERAPY_RESISTANCE_4</b>                  | 278  | 0          | 0.001376694 |
| <b>MASRI_RESISTANCE_TO_TAMOXIFEN_AND_AROMATASE_INHIBITORS_UP</b> | 20   | 0          | 0.001890217 |
| BHAT_ESR1_TARGETS_NOT_VIA_AKT1_UP                                | 204  | 0          | 0.00382444  |
| SANDERSON_PPARA_TARGETS                                          | 15   | 0          | 0.003980889 |
| STEIN_ESR1_TARGETS                                               | 82   | 0          | 0.004202243 |
| DUTERTRE ESTRADIOL_RESPONSE_6HR_UP                               | 218  | 0          | 0.004647776 |
| GINESTIER_BREAST_CANCER_ZNF217_AMPLIFIED_UP                      | 70   | 0          | 0.007160431 |
| <b>RIGGINS_TAMOXIFEN_RESISTANCE_DN</b>                           | 214  | 0          | 0.009965614 |
| <b>CREIGHTON_ENDOCRINE_THERAPY_RESISTANCE_1</b>                  | 486  | 0          | 0.014304999 |
| SMID_BREAST_CANCER_ERBB2_UP                                      | 133  | 0          | 0.014047835 |
| FARMER_BREAST_CANCER_CLUSTER_4                                   | 19   | 0          | 0.0145728   |
| <b>CREIGHTON_ENDOCRINE_THERAPY_RESISTANCE_5</b>                  | 433  | 0          | 0.014851739 |
| SOTIRIOU_BREAST_CANCER_GRADE_1_VS_3_DN                           | 48   | 0          | 0.020131387 |
| FARMER_BREAST_CANCER_BASAL_VS_LUMINAL                            | 319  | 0          | 0.020080987 |
| FARMER_BREAST_CANCER_APOCRINE_VS_LUMINAL                         | 310  | 0          | 0.029645585 |
| DUTERTRE ESTRADIOL_RESPONSE_24HR_UP                              | 313  | 0          | 0.03618678  |
| BHAT_ESR1_TARGETS_VIA_AKT1_UP                                    | 266  | 0          | 0.039732847 |
| <b>PEDERSEN_METASTASIS_BY_ERBB2_ISOFORM_4</b>                    | 105  | 0          | 0.0722964   |
| DOANE_RESPONSE_TO_ANDROGEN_UP                                    | 175  | 0          | 0.087973654 |
| POOLA_INVASIVE_BREAST_CANCER_DN                                  | 132  | 0          | 0.105667904 |
| <b>RICKMAN_METASTASIS_UP</b>                                     | 315  | 0          | 0.10884604  |
| LIU_CMYB_TARGETS_UP                                              | 158  | 0          | 0.1111242   |
| FARMER_BREAST_CANCER_APOCRINE_VS_BASAL                           | 320  | 0          | 0.11942397  |
| RICKMAN_TUMOR_DIFFERENTIATED_WELL_VS_POORLY_DN                   | 355  | 0          | 0.20948274  |
| <b>BIDUS_METASTASIS_UP</b>                                       | 207  | 0          | 0.25332585  |
| FINETTI_BREAST_CANCERS_KINOME_GRAY                               | 15   | 0.00258398 | 0.008974472 |
| <b>RAMALHO_STEMNESS_UP</b>                                       | 196  | 0.00492611 | 0.15747376  |
| CREIGHTON_AKT1_SIGNALING_VIA_MTOR_UP                             | 34   | 0.00595238 | 0.087086536 |
| TURASHVILI_BREAST_DUCTAL_CARCINOMA_VS_LOBULAR_NORMAL_UP          | 71   | 0.0070922  | 0.07324587  |
| ZHANG_BREAST_CANCER_PROGENITORS_UP                               | 397  | 0.00787402 | 0.32233697  |
| <b>PEDERSEN_METASTASIS_BY_ERBB2_ISOFORM_7</b>                    | 366  | 0.00840336 | 0.27146798  |
| YAO_TEMPORAL_RESPONSE_TO_PROGESTERONE_CLUSTER_13                 | 159  | 0.00862069 | 0.228288    |
| <b>ALONSO_METASTASIS_UP</b>                                      | 190  | 0.00862069 | 0.24004322  |
| TURASHVILI_BREAST_DUCTAL_CARCINOMA_VS_DUCTAL_NORMAL_UP           | 43   | 0.00869565 | 0.060420014 |
| WELCSH_BRCA1_TARGETS_UP                                          | 195  | 0.00943396 | 0.24838816  |
| KOBAYASHI_EGFR_SIGNALING_24HR_UP                                 | 98   | 0.01020408 | 0.20334809  |
| NIKOLSKY_BREAST_CANCER_17Q11_Q21_AMPLICON                        | 126  | 0.01229508 | 0.16212785  |
| SMID_BREAST_CANCER_LUMINAL_A_UP                                  | 79   | 0.01706485 | 0.11982087  |
| <b>WINTER_HYPOXIA_UP</b>                                         | 87   | 0.01706485 | 0.21990183  |
| STEIN_ESRRA_TARGETS                                              | 500  | 0.01724138 | 0.42583078  |
| STOSSI_RESPONSE_TO ESTRADIOL                                     | 49   | 0.0212766  | 0.13658299  |
| NIKOLSKY_BREAST_CANCER_12Q13_Q21_AMPLICON                        | 42   | 0.02312139 | 0.15112886  |
| YAO_TEMPORAL_RESPONSE_TO_PROGESTERONE_CLUSTER_10                 | 63   | 0.02614379 | 0.2265053   |
| <b>CHANDRAN_METASTASIS_TOP50_UP</b>                              | 35   | 0.02754821 | 0.12955827  |
| NELSON_RESPONSE_TO_ANDROGEN_UP                                   | 84   | 0.03358209 | 0.25053498  |
| <b>CHANDRAN_METASTASIS_UP</b>                                    | 199  | 0.04568528 | 0.4230729   |
