# Supplementary material
Source: PubMed Central journal article supplement (PMC7415657)
Supplement: NIHMS1597945-supplement-6.pdf [file NIHMS1597945-supplement-6.pdf]

**Table S2. Characteristics of 23 mammary and breast cancer cell lines.** Features of each cell line was derived from reports in the literature or from information provided by the ATCC. TNBC features were obtained from Lehmann et al. J Clin Invest. 2011; 121(7): 2750-2767. AC, adenocarcinoma; CS, carcinosarcoma; DC, ductal carcinoma; IDC, invasive ductal carcinoma; INF, inflammatory ductal carcinoma; MBC, medullary breast cancer. NA, not applicable.

| Cell Line  | BC Subtype | Features           | Tumor |
|------------|------------|--------------------|-------|
| MCF10A     | -          | Luminal, "normal"  | NA    |
| MCF12A     | -          | Luminal, "normal"  | NA    |
| SUM149PT*  | TNBC       | Basal-like         | INF   |
| BT-20      | TNBC       | Unclassified       | IDC   |
| MDA-MB-468 | TNBC       | Basal-like         | DC    |
| HCC1806    | TNBC       | Basal-like         | ASCC  |
| HS578T     | TNBC       | Mesenchymal-like   | CS    |
| MDA-MB-231 | TNBC       | Mesenchymal-like   | IDC   |
| MDA-MB-436 | TNBC       | Basal-like         | IDC   |
| MBA-MB-157 | TNBC       | Mesenchymal-like   | MBC   |
| MDA-MB-453 | TNBC       | Luminal            | AC    |
| MDA-MB-361 | Luminal    | ER+, PR-           | IDC   |
| BT474      | Luminal B  | ER+, PR+, HER+     | IDC   |
| SKBR3      | HER2       | ER-, PR-,HER+      | AC    |
| UACC812    | Luminal B  | ER+, PR +/-, HER2+ | IDC   |
| MCF7       | Luminal A  | ER+, PR+, HER2-    | IDC   |
| SUM190PT*  | HER2       | ER-, PR-,HER+      | INF   |
| JIMT-1     | HER2       | ER-, PR-, HER2+    | IDC   |
| UACC732    | Luminal    | ER +/-, PR+, HER2+ | INF   |
| UACC893    | HER2       | ER-, PR-, HER2+    | IDC   |
| HCC202     | HER2       | ER-, PR-, HER2+    | IDC   |
| HCC1419    | HER2       | ER-, PR-, HER2+    | DC    |
| ZR-75-30   | Luminal B  | ER+, PR-, HER2+    | IDC   |

\*, referred to as SUM149 or SUM190, respectively.
