# Supplementary material
Source: PubMed Central journal article supplement (PMC7415657)
Supplement: NIHMS1597945-supplement-7.pdf [file NIHMS1597945-supplement-7.pdf]

**Table S3. Selected functional pathways affected by changes in EMP2 expression.**  
 Functional pathways differences were analyzed between in SUM149/Ctrl vs. SUM149/kD#2.  
 EMP2 levels significantly altered genes associated with metabolism and hypoxia.

| Gene Set Name                    | Description                                                                                                          | p-value  | FDR q-value |
|----------------------------------|----------------------------------------------------------------------------------------------------------------------|----------|-------------|
| HALLMARK_ESTROGEN_RESPONSE_EARLY | Genes defining early response to estrogen.                                                                           | 1.80E-04 | 4.49E-03    |
| HALLMARK_HEME_METABOLISM         | Genes involved in metabolism of heme (a cofactor consisting of iron and porphyrin) and erythroblast differentiation. | 1.80E-04 | 4.49E-03    |
| HALLMARK_FATTY_ACID_METABOLISM   | Genes encoding proteins involved in metabolism of fatty acids.                                                       | 4.92E-04 | 8.20E-03    |
| HALLMARK_GLYCOLYSIS              | Genes encoding proteins involved in glycolysis and gluconeogenesis.                                                  | 1.41E-03 | 1.18E-02    |
| HALLMARK_HYPOXIA                 | Genes up-regulated in response to low oxygen levels (hypoxia).                                                       | 1.41E-03 | 1.18E-02    |
| HALLMARK_MYC_TARGETS_V1          | A subgroup of genes regulated by MYC - version 1 (v1).                                                               | 1.41E-03 | 1.18E-02    |
