# Supplementary material
Source: PubMed Central journal article supplement (PMC7415657)
Supplement: NIHMS1597945-supplement-8.pdf [file NIHMS1597945-supplement-8.pdf]

**Table S4. Tumorsphere formation of breast cancer cells with modified EMP2 levels.** 50, 500, or 5000 cells were cultured on low adherence 12-well plates. Spheres were counted after 2 weeks and the number of spheres counted notated . The frequency of tumorsphere-initiating cells (TIC) was calculated using the online Extreme Limiting Dilution Analysis (ELDA) calculator [<http://bioinf.wehi.edu.au/software/elda/index.html>].

| # spheres / wells    | 50 cell / well | 500 cells / well | 5000 cells / well | 1 / TIC frequency (95 CI) |
|----------------------|----------------|------------------|-------------------|---------------------------|
| <b>BT474/EMP2</b>    | 4              | 8                | 38                | 1/1<br>(77.9-1)           |
|                      | 1              | 12               | 64                |                           |
|                      | 2              | 7                | 79                |                           |
|                      | 2              | 10               | 71                |                           |
| <b>BT474/Ctrl</b>    | 0              | 5                | 36                | 1/36.1<br>(123-10.6)      |
|                      | 2              | 10               | 40                |                           |
|                      | 3              | 6                | 24                |                           |
|                      | 2              | 8                | 26                |                           |
| <b>BT474/sh KD#1</b> | 0              | 5                | 19                | 1/130<br>(443-38.1)       |
|                      | 0              | 7                | 20                |                           |
|                      | 1              | 1                | 22                |                           |
|                      | 0              | 9                | 17                |                           |
