# Supplementary material
Source: PubMed Central journal article supplement (PMC7415657)
Supplement: NIHMS1597945-supplement-9.pdf [file NIHMS1597945-supplement-9.pdf]

**Table S5. Secondary tumor formation.** The MDA-MB-231 primary tumor treated with control anti-EMP2 mAbs primary tumors was resected, and cells dissociated. A single cell suspension was created and then reinjected into secondary animals at 500, 5000, or 50,000 cells. The presence or absence of a tumor without any further treatment was monitored over a month, and results from two independent experiments are summarized. The number of tumor initiating cells present was determined and used to calculate the breast CSC frequency using the Extreme Limiting Dilution Analysis (ELDA) calculator [<http://bioinf.wehi.edu.au/software/elda/index.html>].

| # Cells Injected                       | Treatment           |                             |
|----------------------------------------|---------------------|-----------------------------|
|                                        | Ctrl mAb            | EMP2 mAb                    |
| 50,000                                 | 7/7                 | 8/9                         |
| 5000                                   | 7/7                 | 2/9                         |
| 500                                    | 5/7                 | 0/9                         |
| <b>CSC<br/>Frequency*<br/>(95% CI)</b> | 1:399<br>(157-1016) | 1:22,595<br>(10,987-46,467) |
